# Supplementary material for: Value of PASI90 Versus Merit-Based Incentive Payment System Efficacy Measures
Source: PubMed Central journal article supplement — J Psoriasis Psoriatic Arthritis. 2022 Apr 19;7(3):140–9. doi: 10.1177/24755303221082623 (PMC11361529; doi:10.1177/24755303221082623), 2022-04-19
Supplement: sj-pdf-1-jps-10.1177_24755303221082623.pdf [file sj-pdf-1-jps-10.1177_24755303221082623.pdf]

### Supplemental Figure 1. Study Design

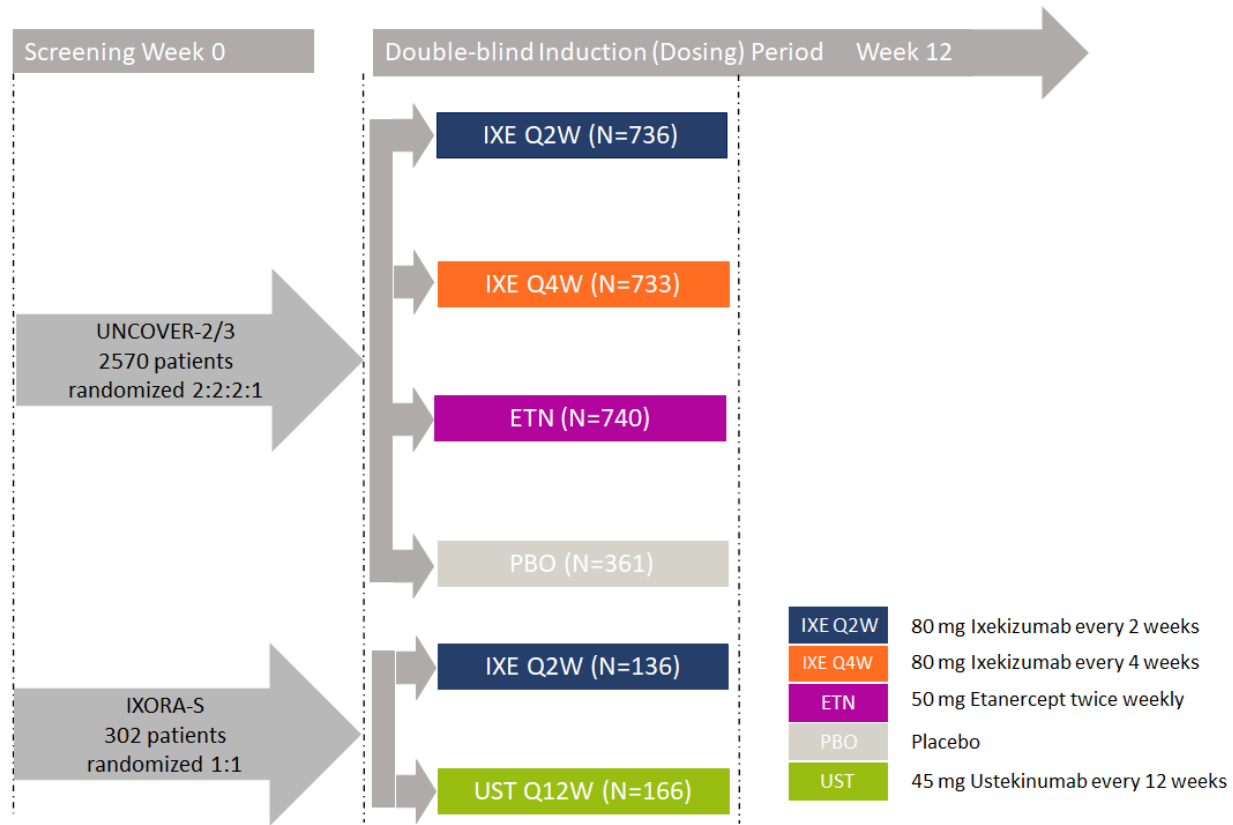

Abbreviations: ETN, etanercept; IXE, ixekizumab; PBO, placebo; Q2W, every 2 weeks; Q4W, every 4 weeks; UST, ustekinumab
